# Supplementary material
Source: PubMed Central journal article supplement (PMC2222961)

## Anti-Adenine Bias

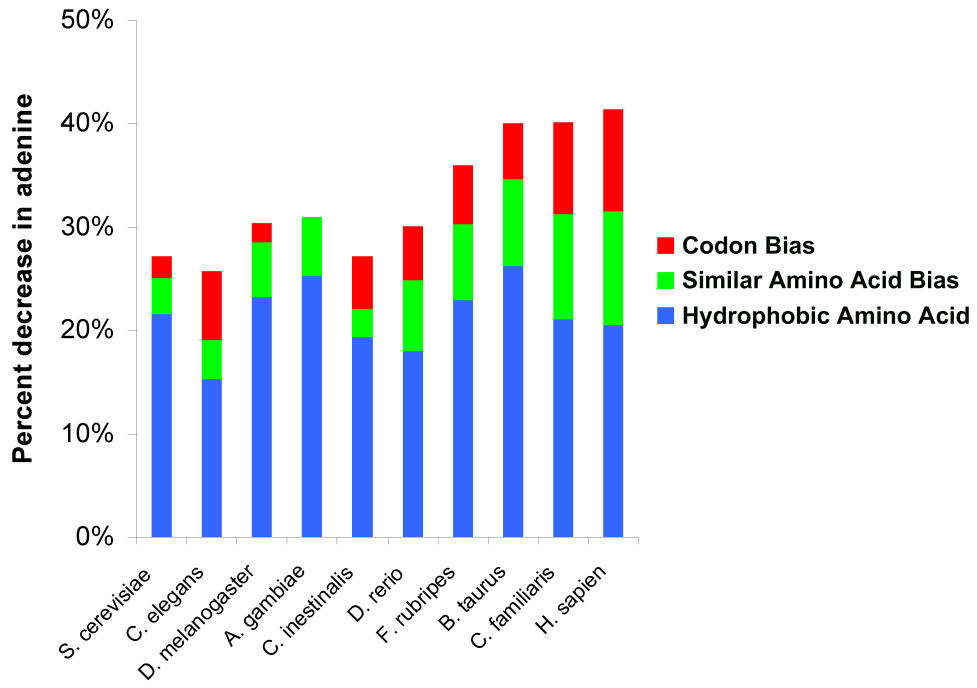

Supplement: pbio.0050322.sg007.pdf [file pbio.0050322.sg007.pdf]
